# Supplementary material for: Tight Junction Protein Expression-Inducing Probiotics Alleviate TNBS-Induced Cognitive Impairment with Colitis in Mice
Source: MDPI journal article supplement (doi:10.3390/nu14142975), 2022-07-20
Supplement: s1 [file s1]

# Tight junction protein expression-inducing probiotics alleviate TNBS-induced cognitive impairment with colitis in mice

Xiao-Yang Ma, Young-Hoo Son, Jong-Wook Yoo, Min-Kyung Joo, Dong-Hyun Kim\*

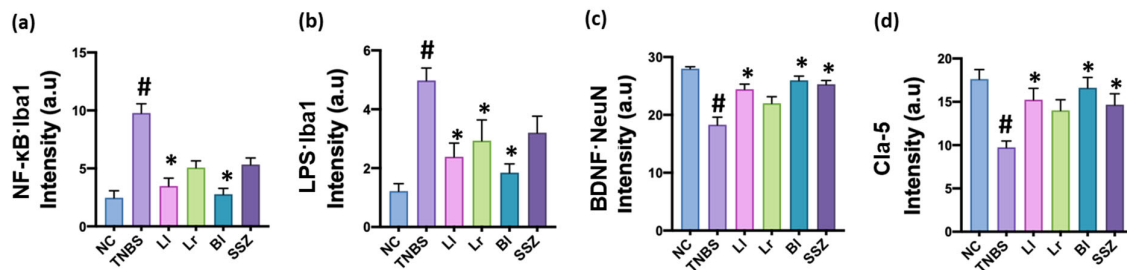

Figure S1. Effects of NK209 (LI), NK210 (Lr), and NK219 (BI) on NF-κB·Iba1<sup>+</sup> (a), BDNF·NeuN<sup>+</sup> (b), LPS·Iba1<sup>+</sup> (c), claudin (Cla)-5<sup>+</sup> cell populations in the hippocampus of mice with TNBS-impaired cognitive function. The entire intensities of the single plane images were quantified by ImageJ software ([github.com/imagej/imagej1](https://github.com/imagej/imagej1)). Data indicate mean ± SD ( $n = 8$ ). # $p < 0.05$  vs. NC. \* $p < 0.05$  vs. TNBS.

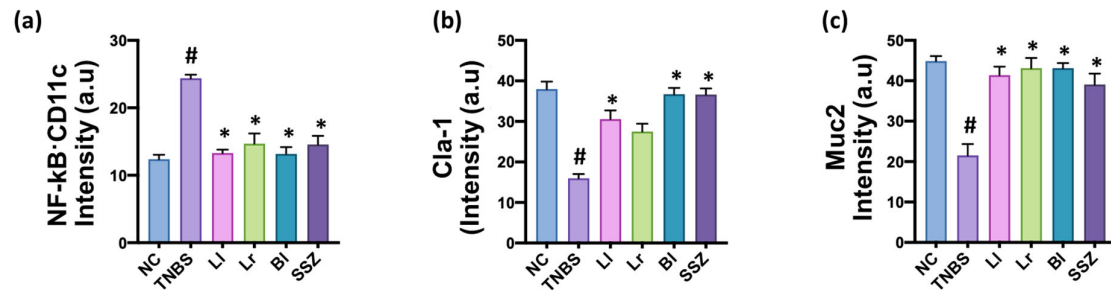

Figure S2 Effects of NK209 (LI), NK210 (Lr), and NK219 (BI) on NF-κB·CD11c<sup>+</sup> (a), claudin (Cla)-1<sup>+</sup> (b), and mucin (Muc)2<sup>+</sup> (c) cell populations in the colon of mice with TNBS-induced colitis. The entire intensities of the single plane images were quantified by ImageJ software ([github.com/imagej/imagej1](https://github.com/imagej/imagej1)). Data indicate mean ± SD ( $n = 8$ ). # $p < 0.05$  vs. NC. \* $p < 0.05$  vs. TNBS.

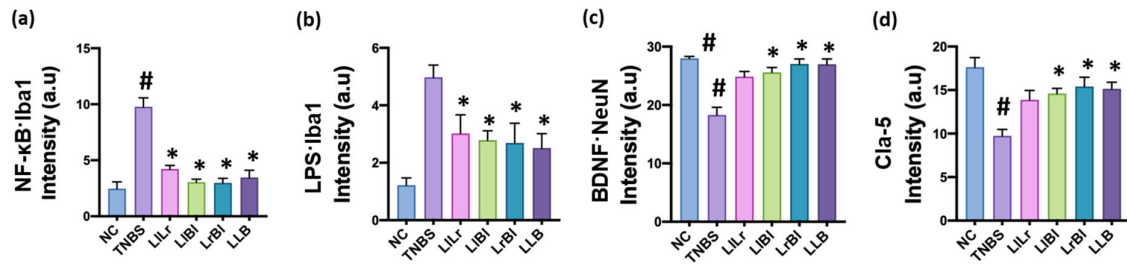

Figure S3. The combined effects of NK209 (LI), NK210 (Lr), and NK219 (BI) on NF-κB:Iba1<sup>+</sup> (a), BDNF<sup>+</sup>NeuN<sup>+</sup> (b), LPS:Iba1<sup>+</sup> (c), claudin (Cla)-5<sup>+</sup> cell populations in the hippocampus of mice with TNBS-impaired cognitive function. The entire intensities of the single plane images were quantified by ImageJ software ([github.com/imagej/imagej1](https://github.com/imagej/imagej1)). Data indicate mean  $\pm$  SD ( $n = 8$ ). # $p < 0.05$  vs. NC. \* $p < 0.05$  vs. TNBS.

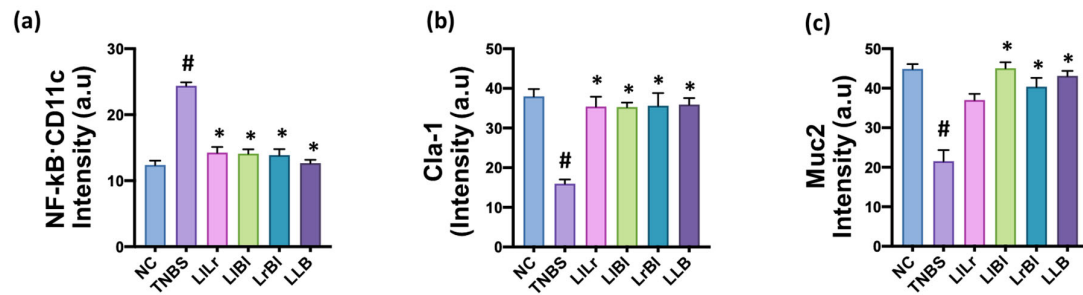

Figure S4. Figure 6. The combined effects of NK209 (LI), NK210 (Lr), and NK219 (BI) on NF-κB:CD11c<sup>+</sup> (a), claudin (Cla)-1<sup>+</sup> (b), and mucin (Muc)2<sup>+</sup> (c) cell populations in the colon of mice with TNBS-induced colitis. The entire intensities of the single plane images were quantified by ImageJ software ([github.com/imagej/imagej1](https://github.com/imagej/imagej1)). Data indicate mean  $\pm$  SD ( $n = 8$ ). # $p < 0.05$  vs. NC. \* $p < 0.05$  vs. TNBS.
